# Supplementary material for: Galectin-9 expression correlates with therapeutic effect in rheumatoid arthritis
Source: PubMed Central journal article supplement (PMC7946964; doi:10.1038/s41598-021-85152-2), 2021-03-10

# **Galectin-9 expression correlates with therapeutic effect in rheumatoid arthritis**

Jiao Sun<sup>1,2</sup>, Yameng Sui<sup>1,3</sup>, Yunqing Wang<sup>1,4</sup>, Lijun Song<sup>1,5</sup>, Dong Li<sup>1,6</sup>, Guosheng Li<sup>1,7</sup>, Jianwei Liu<sup>1</sup>, Qiang Shu<sup>1,5\*</sup>

\*Correspondence: [shuqiang@sdu.edu.cn](mailto:shuqiang@sdu.edu.cn)

<sup>1</sup> Department of Rheumatology, Qilu Hospital of Shandong University, Ji'nan 250012, Shandong, China.

<sup>2</sup> Department of Nephrology and Immunology, Shandong Provincial Third Hospital, Shandong University, Ji'nan 250031, Shandong, China

<sup>3</sup> Department of Rheumatology and Immunology, Yantai Mountain Hospital, Yantai 264001, Shandong, China.

<sup>4</sup> Department of Rheumatology and Immunology, Guangdong Second Provincial General Hospital, Guangzhou 510317, Guangdong, China.

<sup>5</sup> Shenzhen Research Institute of Shandong University, Shenzhen 518057, Guangdong, China.

<sup>6</sup> Cryomedicine Laboratory, Qilu Hospital of Shandong University, Ji'nan 250012, Shandong, China.

<sup>7</sup> Department of Hematology, Qilu Hospital of Shandong University, Ji'nan 250012, Shandong, China

Table S1. Dosage of TAC, MTX, and Pred in different disease activity groups

|                                             |     | Mild group<br>(n=16) | Moderate group<br>(n=44) | Severe group<br>(n=17) |
|---------------------------------------------|-----|----------------------|--------------------------|------------------------|
| DAS28,(X±SD)                                | 0w  | 2.49±0.58            | 4.15±0.57**              | 5.96±0.7**             |
| Dosage of TAC(mg/d),<br>median(IQR)         | 0w  | 2(1,2)               | 2(2,2)                   | 2(1,2)                 |
|                                             | 12w | 2(1,2.5)             | 2(0.75,2)                | 2(1,2)                 |
| Dosage of MTX(mg/w) ,<br>median(IQR)        | 0w  | 10(7.5,10)           | 10(5,12.5)               | 10(5,15)               |
|                                             | 12w | 10(7.5,15)           | 10(5,15)                 | 10(7.5,10)             |
| Dosage of Pred(mg/d),<br>median(IQR)        | 0w  | 8.75(2.5,20)         | 10(5,30)                 | 15(5,50)               |
|                                             | 12w | 7.5(2.5,17.5)        | 10(2.5,15)               | 10(5,15)               |
| Concentration of<br>TAC(ng/ml), median(IQR) | 3w  | 3(2,10.7)<br>(n=6)   | 4.8(1.8,14.5) (n=15)     | 6.6(5.5,26)<br>(n=3)   |

DAS28: Disease Activity Score-28; TAC: tacrolimus; MTX: methotrexate; Pred: prednisolone; IQR: interquartile range; The drug dose between three groups was tested by non-parametric test, while DAS28 was analyzed by ANOVA. Statistical difference of different groups at same time point was marked compared to mild group by\*, \*P<0.05, \*\*P<0.01.

Table S2. Changes of Galectin-9 levels in different treatment subgroups from baseline to 12weeks

|                                          | T+M+P       |                         | T+M         |                       | T+P         |             |
|------------------------------------------|-------------|-------------------------|-------------|-----------------------|-------------|-------------|
|                                          | (n=17)      |                         | (n=10)      |                       | (n=5)       |             |
|                                          | 0w          | 12w                     | 0w          | 12w                   | 0w          | 12w         |
| DAS28                                    | 4.52±1.09   | 2.88±0.96 <sup>##</sup> | 3.95±1.51   | 3.1±1.92 <sup>#</sup> | 3.3±0.78    | 2.06±0.89   |
| pGal-9(pg/ml)                            | 3313±1684   | 2461±1140               | 4396±1403   | 3343±1407             | 4284±1193   | 2694±1056   |
| CD3 <sup>+</sup> Gal-9 <sup>+</sup> (%)  | 21.87±27.81 | 8.57±14.05              | 21.56±34.36 | 9.3±8.63              | 31.54±39.07 | 7.48±5.09   |
| CD4 <sup>+</sup> Ga-9 <sup>+</sup> (%)   | 21.18±23.24 | 8.89±7.96               | 29.66±37.51 | 18.28±13.71           | 17.78±13.2  | 12.84±17.8  |
| CD8 <sup>+</sup> Gal-9 <sup>+</sup> (%)  | 19.88±22.06 | 8.26±7.27               | 28.81±35.6  | 12.65±11.25           | 20.76±7.98  | 13.41±16.64 |
| Treg <sup>+</sup> Gal-9 <sup>+</sup> (%) | 15.74±14.12 | 9.89±10.83              | 27.32±33.19 | 16.58±17.44           | 15.05±19.05 | 14.66±20.72 |
| DNTGal-9 <sup>+</sup> (%)                | 22.22±21.15 | 7.72±7.58               | 27.73±35.8  | 15.07±14.45           | 8.26±4.23   | 17.06±17.84 |

DAS28: Disease Activity Score-28; Gal-9: Galectin-9; T: Tacrolimus; M: MTX; P: Prednisone;

Treg+: regulatory T cells, DNT+: Double negative T cell, T+Gal+(%): percentage of T cell

expressed Gal-9. pGal9 and DAS28 was analyzed by ANOVA, while other different index was

tested by non-parametric test. Statistical difference between different subgroups at same time point

was marked by\*, \* $P < 0.05$ . Self-control analysis between 0w and 12w of same subgroup was marked

by#, # $P < 0.05$ , ## $P < 0.01$ ; Values are shown as  $X \pm SD$ .

Table S3. The correlations of pGal-9 with different cytokine levels in RA patients

at baseline

|                        | pGal-9<br>(pg/ml) | pVEGF<br>(pg/ml) | pTNF- $\alpha$ (pg/ml) |
|------------------------|-------------------|------------------|------------------------|
| pVEGF(pg/ml)           | -0.06             |                  |                        |
| pTNF- $\alpha$ (pg/ml) | 0.10              | 0.21             |                        |
| pIL-6(pg/ml)           | 0.23              | 0.25             | 0.41                   |

The correlation was analyzed using the Spearman correlation test. \*\*P<0.01, \*P<0.05.

Table S4. Gal-9 levels in different self-antibody subgroup of RA patients

|                                        |     | ACPA                                         |             |                                               |
|----------------------------------------|-----|----------------------------------------------|-------------|-----------------------------------------------|
|                                        |     | Low titers of<br>ACPA titers (< 200<br>U/ml) |             | High titers of<br>ACPA titers (> 200<br>U/ml) |
|                                        |     | Negative (n=6)                               | (n=3)       | (n=10)                                        |
| DAS28-CRP                              | 0w  | 3.49±0.54                                    | 2.85±0.48   | 4.11±1.31                                     |
|                                        | 12w | 2.3±0.54                                     | 3.17±1.63   | 2.77±1.63                                     |
| pGal-9(pg/ml)                          | 0w  | 3930±1999                                    | 4376±1426   | 3307±2001                                     |
|                                        | 12w | 2825±85                                      | 3052±959    | 2843±522                                      |
| CD3 <sup>+</sup> Gal <sup>+</sup> (%)  | 0w  | 8.91±4.09                                    | 13.18±10.23 | 39.29±38.29                                   |
|                                        | 12w | 11.36±10.17                                  | 10.67±12.64 | 29.46±41.64                                   |
| CD4 <sup>+</sup> Gal <sup>+</sup> (%)  | 0w  | 18.19±11.68                                  | 8.04±5.64   | 16.25±11.66                                   |
|                                        | 12w | 11.58±5.02                                   | 17.81±11.85 | 11.41±16.11                                   |
| CD8 <sup>+</sup> Gal <sup>+</sup> (%)  | 0w  | 22.83±6.89                                   | 16.65±12.89 | 19.38±8.72                                    |
|                                        | 12w | 10.2±7.54                                    | 17.95±16.43 | 8.66±12.22                                    |
| Treg <sup>+</sup> Gal <sup>+</sup> (%) | 0w  | 23.92±22.2                                   | 18.37±22.63 | 20.79±17.11                                   |
|                                        | 12w | 7.55±5.75                                    | 22.07±21.27 | 14.17±19.56                                   |
| DNTGal <sup>+</sup> (%)                | 0w  | 15.18±10.18                                  | 17.21±20.02 | 18.08±9.95                                    |
|                                        | 12w | 19.61±19.5                                   | 17.08±12.09 | 6.95±9.83                                     |

Gal-9: Galectin-9; ACPA: Anti-citrullinated peptide antibody, RF: rheumatoid factors; T<sup>+</sup>Gal-9<sup>+</sup>(%):

percentage of T cell expressed Gal-9. pGal9 and DAS28 was analyzed by ANOVA, while other

different index was tested by non-parametric test. Statistical difference between different groups at same time point was marked by\*, \* $P < 0.05$ , \*\* $P < 0.01$ . Values are shown as  $X \pm SD$ .

Figure S1. VEGF, TNF- $\alpha$ , IL-6 and CRP expression in 33 RA patients at baseline and after treatment

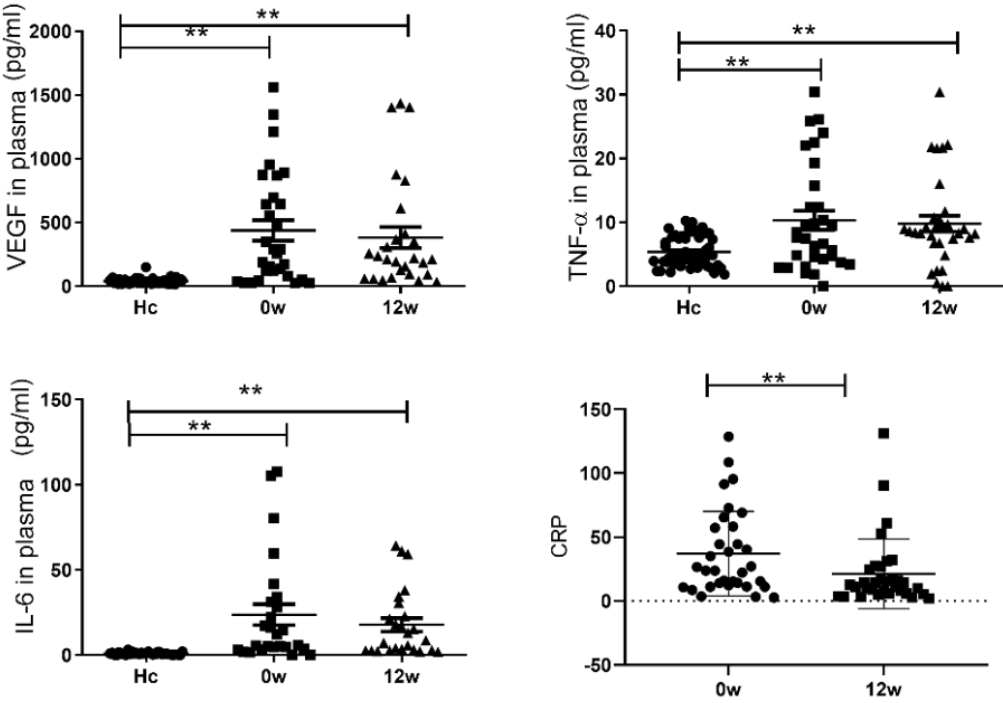

Supplement: 41598_2021_85152_MOESM1_ESM.pdf [file 41598_2021_85152_MOESM1_ESM.pdf]
